# Supplementary material for: Assessment of serum symmetric dimethylarginine and creatinine concentrations in hyperthyroid cats before and after a fixed dose of orally administered radioiodine
Source: PubMed Central journal article supplement (PMC7379014; doi:10.1111/jvim.15831), 2020-06-07
Supplement: JVIM-34-1423-s001.pdf [file JVIM-34-1423-s001.pdf]

**Supplementary Table 1. Mean body weight, body condition score, muscle condition score and systolic blood pressure in 80 hyperthyroid cats before (T0) and after (T1) radioiodine treatment**

|                                   | <b>T0</b>           | <b>T1</b>           | <b>Estimated difference; T1-T0 (95% confidence interval)</b> | <b>p-value</b>                   |
|-----------------------------------|---------------------|---------------------|--------------------------------------------------------------|----------------------------------|
|                                   | <b>Mean (SD)</b>    | <b>Mean (SD)</b>    |                                                              | <b>Paired t-test</b>             |
| Body weight (kg)                  | 4.2 (1.1)           | 4.7 (1.2)           | 0.5 (0.4, 0.6)                                               | <0.001                           |
| Blood pressure (mmHg)             | 178.9 (29.45)       | 160.8 (32.43)       | -18.1 (-27.7, -8.6)                                          | <0.001                           |
|                                   | <b>Median (IQR)</b> | <b>Median (IQR)</b> |                                                              | <b>Wilcoxon signed-rank test</b> |
| Body condition score (out of 9)   | 4.0 (3-5)           | 5.0 (4-5)           | 1 (0.5,1)                                                    | <0.001                           |
| Muscle condition score (out of 4) | 3 (2-3)             | 4 (3-4)             | 1 (0.5,1)                                                    | <0.001                           |

Legend: T0, before treatment; T1, after treatment

**Supplementary Table 2. Clinicopathologic data before (T0) and after (T1) radioiodine treatment in 66 cats with a total thyroxine concentration within the reference interval after treatment.**

|                          | T0 |               | T1 |               | Estimated mean difference; T1-T0 (95% confidence interval) | p-value* |
|--------------------------|----|---------------|----|---------------|------------------------------------------------------------|----------|
|                          | n  | Mean (SD)     | n  | Mean (SD)     |                                                            |          |
| PCV (%)                  | 66 | 36.4 (4.3)    | 66 | 34.1 (0.0)    | -2.3 (-3.3, -1.3)                                          | <0.001   |
| TP (g/dL)                | 66 | 68.5 (5.6)    | 66 | 73.9 (5.0)    | 5.4 (4.0, 6.9)                                             | <0.001   |
| Serum TT4 (µg/dL)        | 66 | 10.7 (4.3)    | 66 | 1.6 (0.5)     | -9.11 (-10.2, -8.0)                                        | <0.001   |
| Serum Creatinine (mg/dL) | 66 | 0.94 (0.34)   | 66 | 1.6 (0.4)     | 0.65 (0.6, 0.8)                                            | <0.001   |
| Serum urea (mg/dL)       | 66 | 8.5 (2.6)     | 66 | 10.2 (2.6)    | 1.7 (1.2, 2.2)                                             | <0.001   |
| Serum SDMA (µg/dL)       | 63 | 12.7 (5.9)    | 63 | 16.5 (13.5)   | 3.8 (1.4, 6.2)                                             | 0.002    |
| Urine specific gravity   | 62 | 1.041 (0.010) | 62 | 1.033 (0.014) | -0.007 (-0.010, -0.004)                                    | <0.001   |

Legend: \*Paired t-test; T0, before treatment; T1, after treatment; TP, total protein; TT4, total thyroxine; SDMA, symmetric dimethylarginine

**Supplementary Table 3. Clinicopathologic data before and after radioiodine treatment in 12 cats with a total thyroxine concentration below the reference interval after treatment**

|                          | Before treatment |               | After treatment |               | Estimated mean difference; T1-T0 (95% confidence interval) | p-value* |
|--------------------------|------------------|---------------|-----------------|---------------|------------------------------------------------------------|----------|
|                          | n                | Mean (SD)     | n               | Mean (SD)     |                                                            |          |
| PCV (%)                  | 12               | 36.6 (6.9)    | 12              | 31.7 (4.9)    | -4.9 (-8.0, -1.8,)                                         | 0.005    |
| TP (g/dL)                | 12               | 70.9 (5.3)    | 12              | 79.0 (5.2)    | 8.1 (4.3, 11.9)                                            | 0.001    |
| Serum TT4 (µg/dL)        | 12               | 9.3 (5.5)     | 12              | 0.55 (0.1)    | -8.8 (-12.3, -5.3)                                         | <0.001   |
| Serum Creatinine (mg/dL) | 12               | 1.0 (0.3)     | 12              | 1.8 (0.5)     | 0.8 (0.6, 1.1)                                             | <0.001   |
| Serum urea (mg/dL)       | 12               | 23.8 (6.7)    | 12              | 35.9 (11.8)   | 12.0 (5.6, 18.5)                                           | <0.001   |
| Serum SDMA (µg/dL)       | 10               | 16.0 (13.10)  | 10              | 12.3 (3.9)    | -3.7 (-12.6, 5.1)                                          | 0.36     |
| Urine specific gravity   | 12               | 1.040 (0.009) | 12              | 1.033 (0.013) | -0.007 (-0.013, 0)                                         | 0.04     |

Legend: \*Paired t-test; T0 before treatment; T1, after treatment; TP, total protein; TT4, total thyroxine; SDMA, symmetric dimethylarginine

**Supplementary Table 4. Multivariable analysis using a general linear model to assess the effect of extra-renal variables on SDMA at before (T0) and after (T1) radioiodine treatment.**

| Extra-renal variables  | Time | df    | F    | Direction of difference | Difference of means |                   | P-value |
|------------------------|------|-------|------|-------------------------|---------------------|-------------------|---------|
|                        |      |       |      |                         | Estimate            | 95% CI            |         |
| Body condition score   | T0   | 1, 62 | 0.24 | 9-1                     | -0.0076             | -0.0385, 0.0233   | 0.626   |
|                        | T1   | 1, 71 | 0.03 | 9-1                     | -0.00089            | -0.01056, 0.00878 | 0.854   |
| Muscle condition score | T0   | 1, 62 | 1.56 | 4-0                     | -0.0266             | -0.0692, 0.0160   | 0.216   |
|                        | T1   | 1, 71 | 0.20 | 4-0                     | 0.00394             | -0.01354, 0.02142 | 0.655   |
| Sedation               | T0   | 1, 62 | 2.10 | Yes-No                  | 0.0218              | -0.0082, 0.0518   | 0.152   |

Legend: T0, before treatment; T1, after treatment

**Supplementary Table 5. Multivariable analysis using a general linear model to assess the effect of extra-renal variables on creatinine at before (T0) and after (T1) radioiodine treatment.**

| Extra-renal variables  | Time | df    | F    | Direction of difference | Difference of means |               | P-value |
|------------------------|------|-------|------|-------------------------|---------------------|---------------|---------|
|                        |      |       |      |                         | Estimate            | 95% CI        |         |
| Body condition score   | T0   | 1, 65 | 0.11 | 9-1                     | 2.73                | -13.62, 19.07 | 0.740   |
|                        | T1   | 1, 62 | 0.05 | 9-1                     | 0.014               | -0.113, 0.141 | 0.822   |
| Muscle condition score | T0   | 1, 65 | 0.03 | 4-0                     | -2.00               | -23.80, 19.80 | 0.858   |
|                        | T1   | 1, 62 | 0.20 | 4-0                     | 0.052               | -0.179, 0.284 | 0.653   |
| Sedation               | T0   | 1, 65 | 0.19 | Yes-No                  | -3.40               | -19.17, 12.37 | 0.668   |

Legend: T0, before treatment; T1, after treatment

**Supplementary Figure 1. Serum creatinine of 80 cats before (T0) and after (T1) radioiodine treatment.**

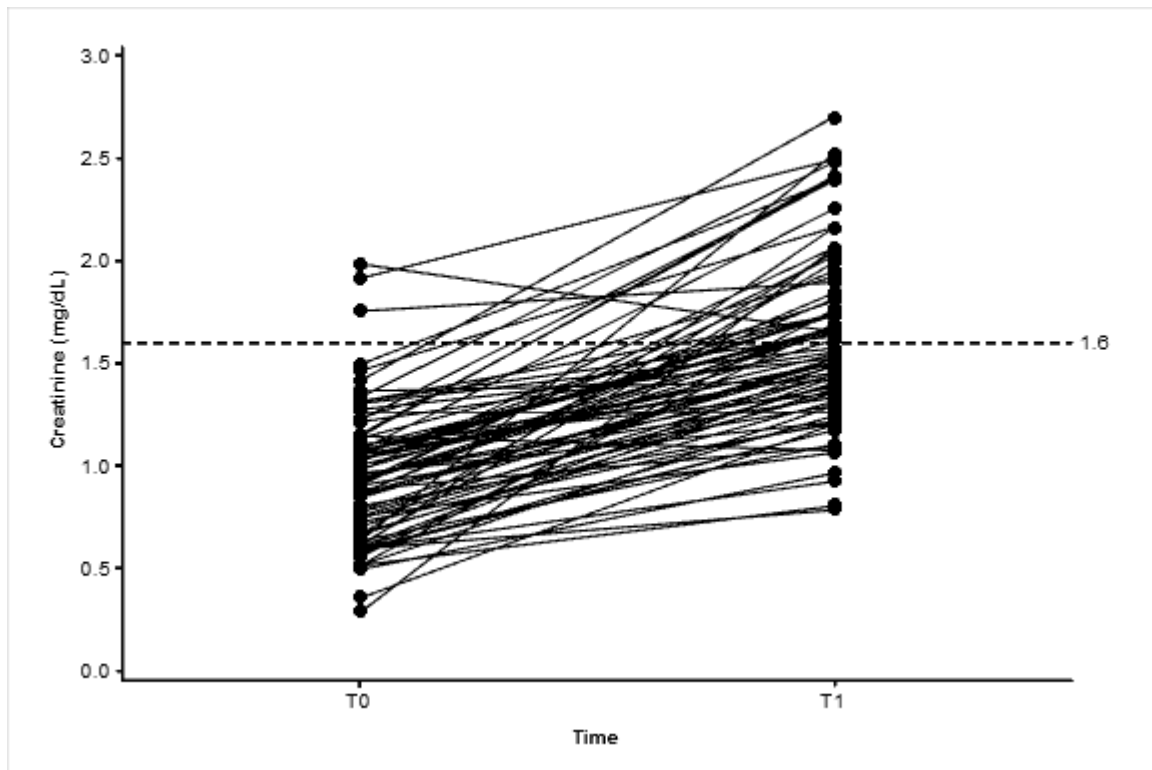

Legend: T0, before treatment; T1, after treatment. The dotted line represents the serum creatinine cut-off value for renal azotemia according to International Renal Interest Society chronic kidney disease staging guidelines.

**Supplementary Figure 2. Urine specific gravity in 76 Cats before (T0) and after (T1) radioiodine treatment.**

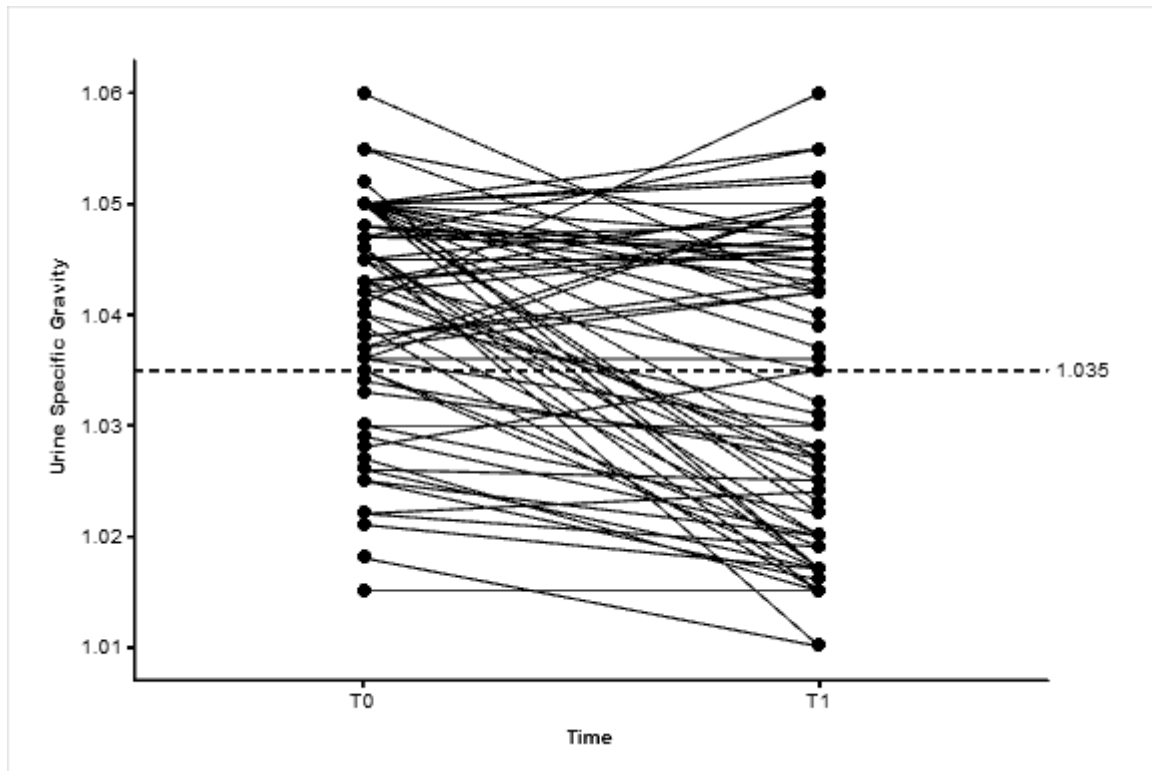

Legend: T0, before treatment; T1, after treatment. The dotted line represents the lower cut-off for adequate urine concentration according to International Renal Interest Society chronic kidney disease staging guidelines.
